# Supplementary material for: Intranasal Vaccination With Recombinant Antigen-FLIPr Fusion Protein Alone Induces Long-Lasting Systemic Antibody Responses and Broad T Cell Responses
Source: PubMed Central journal article supplement (PMC8543008; doi:10.3389/fimmu.2021.751883), 2021-10-11
Supplement: DataSheet_1.pdf [file DataSheet_1.pdf]

## *Supplementary Material*

### **Intranasal vaccination with recombinant antigen-FLIPr fusion protein alone induces long-lasting systemic antibody responses and broad T cell responses**

Ming-Shu Hsieh<sup>1</sup>, Chia-Wei Hsu<sup>1</sup>, Ling-Ling Tu<sup>1</sup>, Kit Man Chai<sup>1</sup>, Li-Lu Yu<sup>1</sup>, Chiao-Chieh Wu<sup>1</sup>, Mei-Yu Chen<sup>1</sup>, Chen-Yi Chiang<sup>1</sup>, Shih-Jen Liu<sup>1, 2, 3</sup>, Ching-Len Liao<sup>1</sup>, Hsin-Wei Chen<sup>1, 2, 3\*</sup>

<sup>1</sup>National Institute of Infectious Diseases and Vaccinology, National Health Research Institutes, Miaoli, 35053, Taiwan.

<sup>2</sup>Graduate Institute of Biomedical Sciences, China Medical University, Taichung, 406040, Taiwan.

<sup>3</sup>Graduate Institute of Medicine, Kaohsiung Medical University, Kaohsiung, 307378, Taiwan.

\*Correspondence:

Hsin-Wei Chen (Email: [chenhw@nhri.org.tw](mailto:chenhw@nhri.org.tw))

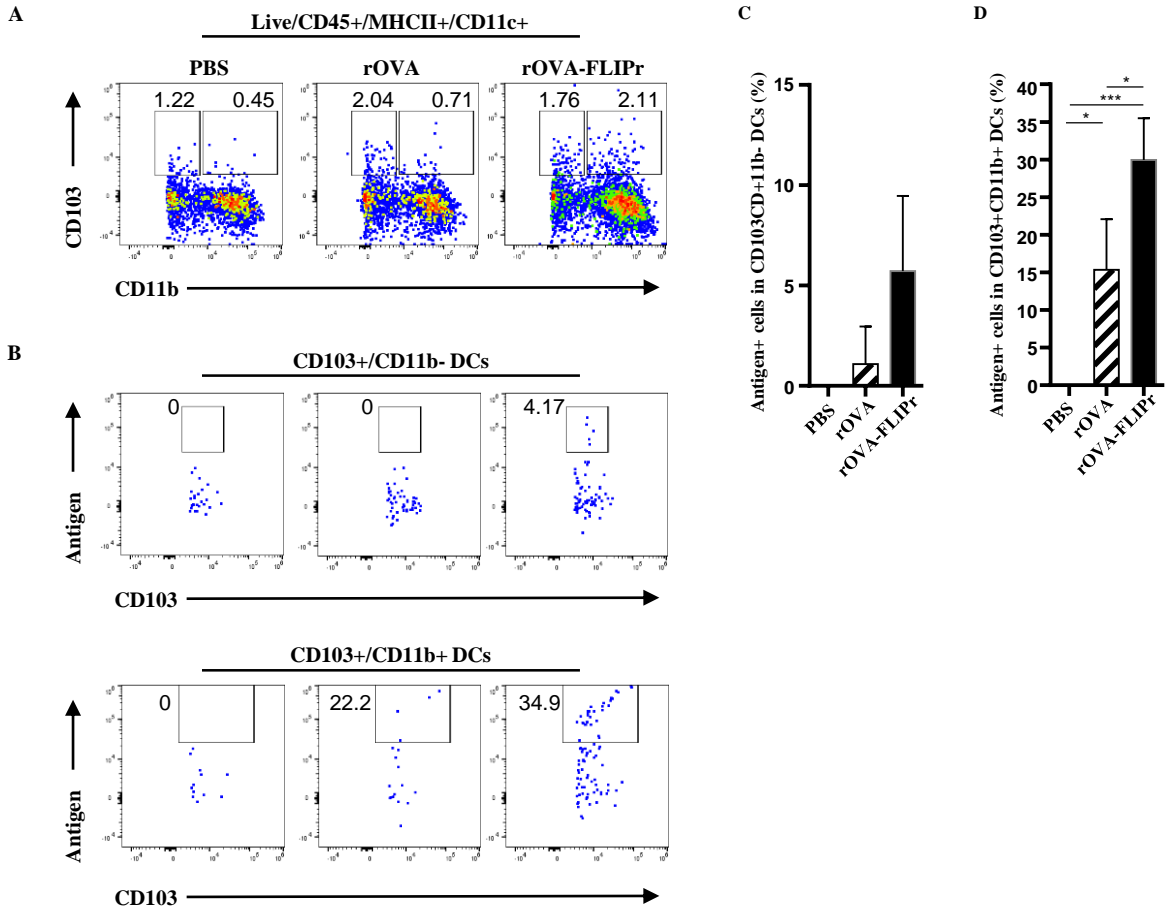

**Supplementary Figure S1. Ovalbumin fusion with FLIPr efficiently delivers to NALT CD103<sup>+</sup> dendritic cells via intranasal administration. (A)** NALT DCs gated on live/CD45<sup>+</sup>/CD11c<sup>+</sup>/MHCII<sup>+</sup> cells are separated by the expression of CD103 and CD11b. **(B)** The representative figure of antigen-labeled CD103<sup>+</sup>CD11b<sup>-</sup> or CD103<sup>+</sup>CD11b<sup>+</sup> DCs. The box representative the antigen positive cells. **(C)** The frequencies of antigen-labeled CD103<sup>+</sup>CD11b<sup>-</sup> DCs. **(D)** The frequencies of antigen-labeled CD11c<sup>+</sup>/MHCII<sup>+</sup>/CD103<sup>+</sup>CD11b<sup>-</sup> DCs. Cumulative data from three individual experiments are quantified here. The data are presented as the mean  $\pm$  SEM (n=3).

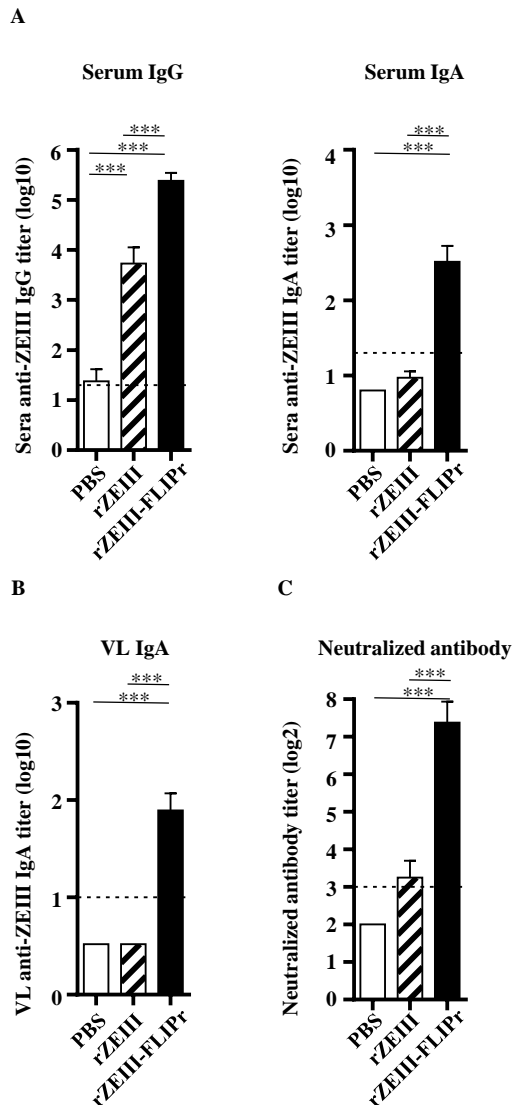

**Supplementary Figure S2. Antibody responses induced by intranasal administration of rZEIII-FLIPr in C57BL/6 mice.** Immunocompetent C57BL/6 mice (n=8/group) were vaccinated three times with PBS, rZEIII, or rZEIII-FLIPr (30  $\mu$ g per dose) via the intranasal route at two-week intervals. Serum and VL samples were collected from vaccinated mice 6 weeks after the first vaccination. **(A)** The titers of anti-rZEIII IgG and IgA antibodies in the serum were determined by ELISA. **(B)** The titers of anti-rZEIII IgA antibodies in VL were determined by ELISA. **(C)** The Zika virus-neutralizing capacity of the serum samples was determined by FRNT. The neutralizing antibody titer was defined as the reciprocal of the highest dilution that resulted in a 50% reduction in FFUs compared to the FFUs of control samples containing the virus alone. Data represent the mean  $\pm$  SE of a total of 9 mice per group, which were pooled from 2 independent experiments. The detection limit is indicated by the dotted line on the y-axis, which indicates the initial dilution factor of the sample. Statistical significance was determined using the Kruskal-Wallis test with Dunn's multiple comparison test. \*\*\*p < 0.001.
